# Supplementary figures and images for: Phylogeography of Rotavirus G8P[8] Detected in Argentina: Evidence of Transpacific Dissemination
Source: MDPI journal article supplement (doi:10.3390/v14102223), 2022-10-09

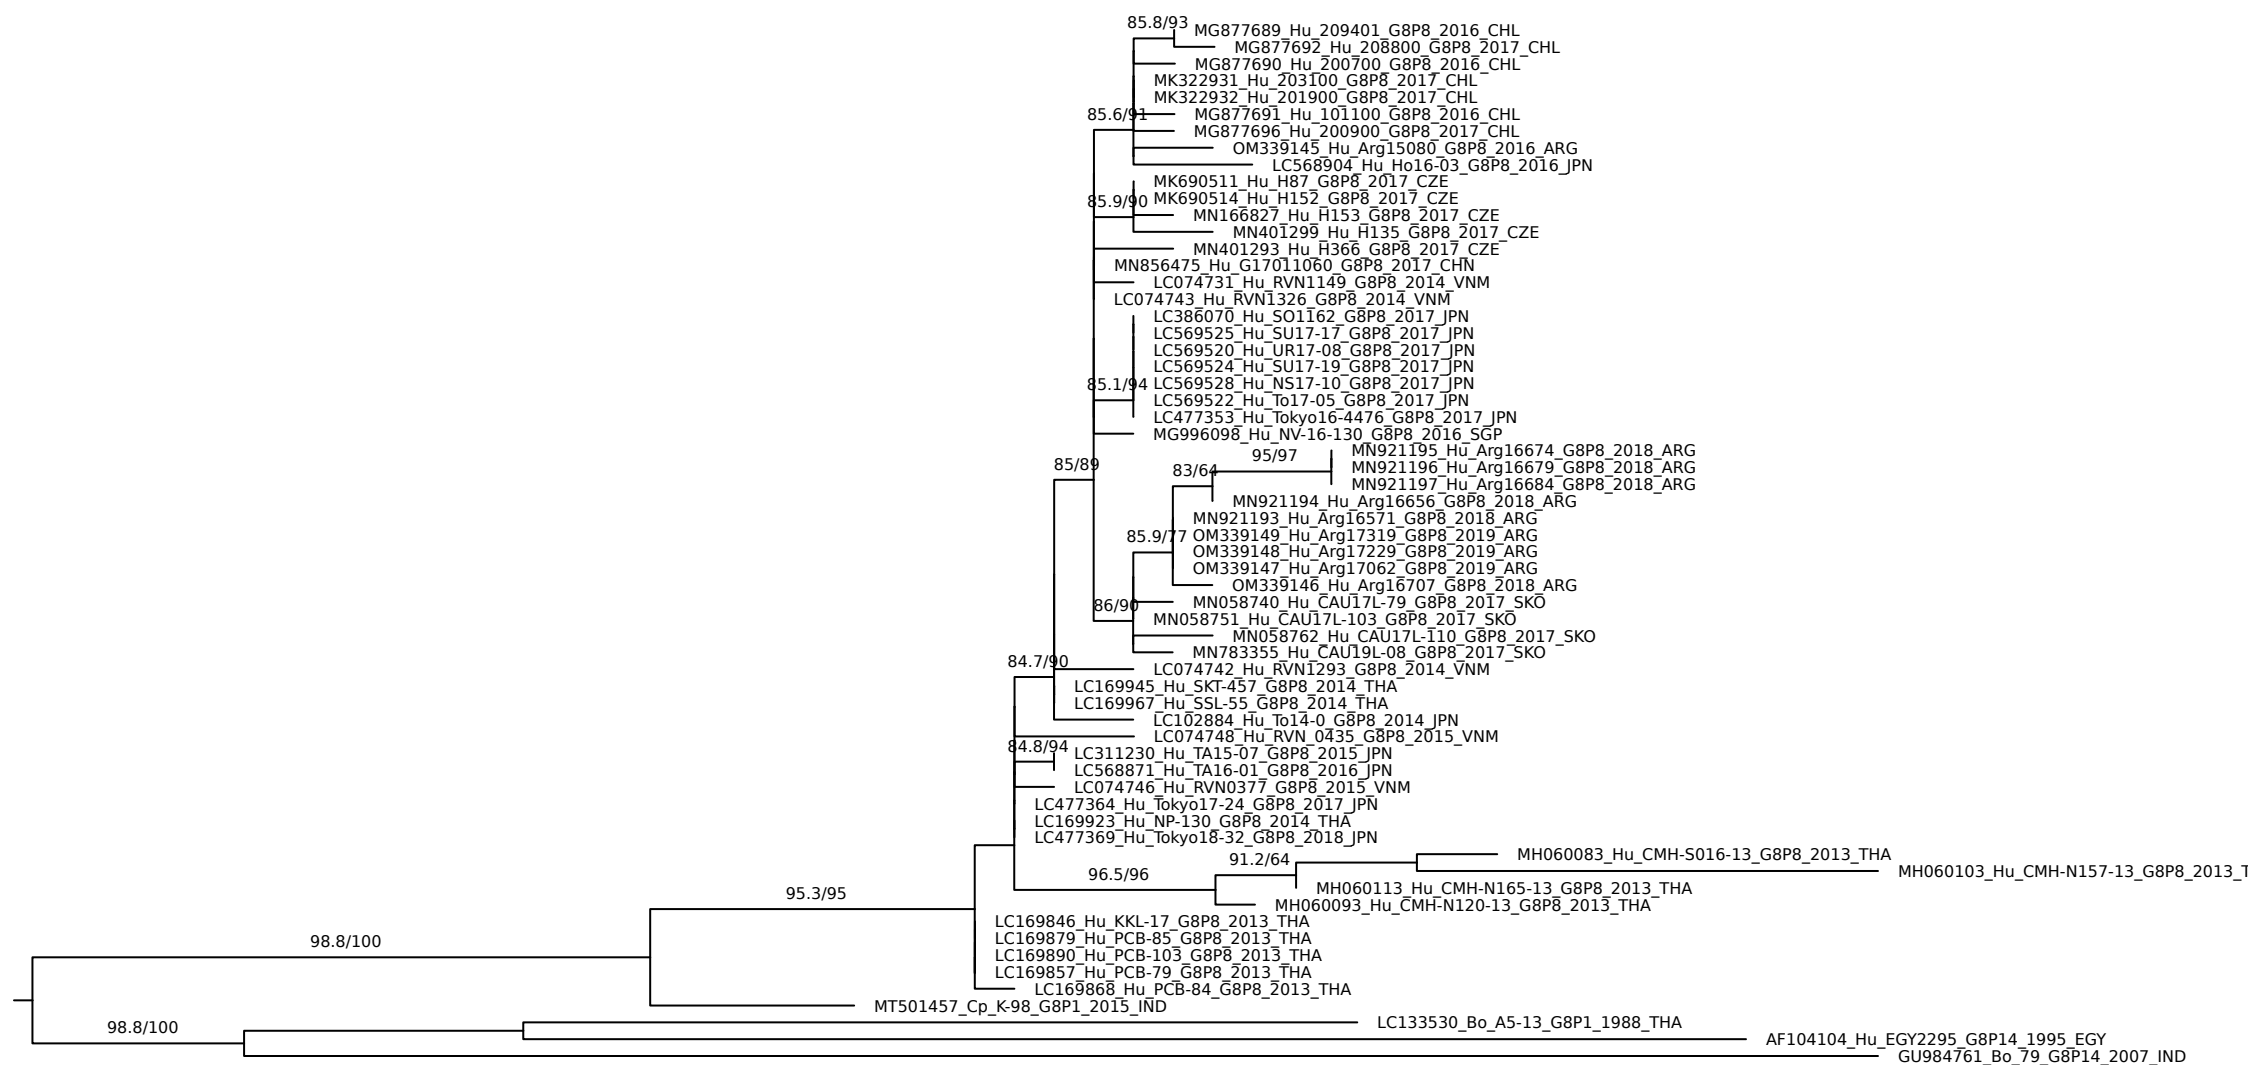

0.01

Supplement: s1 [file s1]

country

- ARG
- CHL
- CHN
- CZE
- EGY
- IND
- JPN
- SGP
- SKO
- THA
- VNM

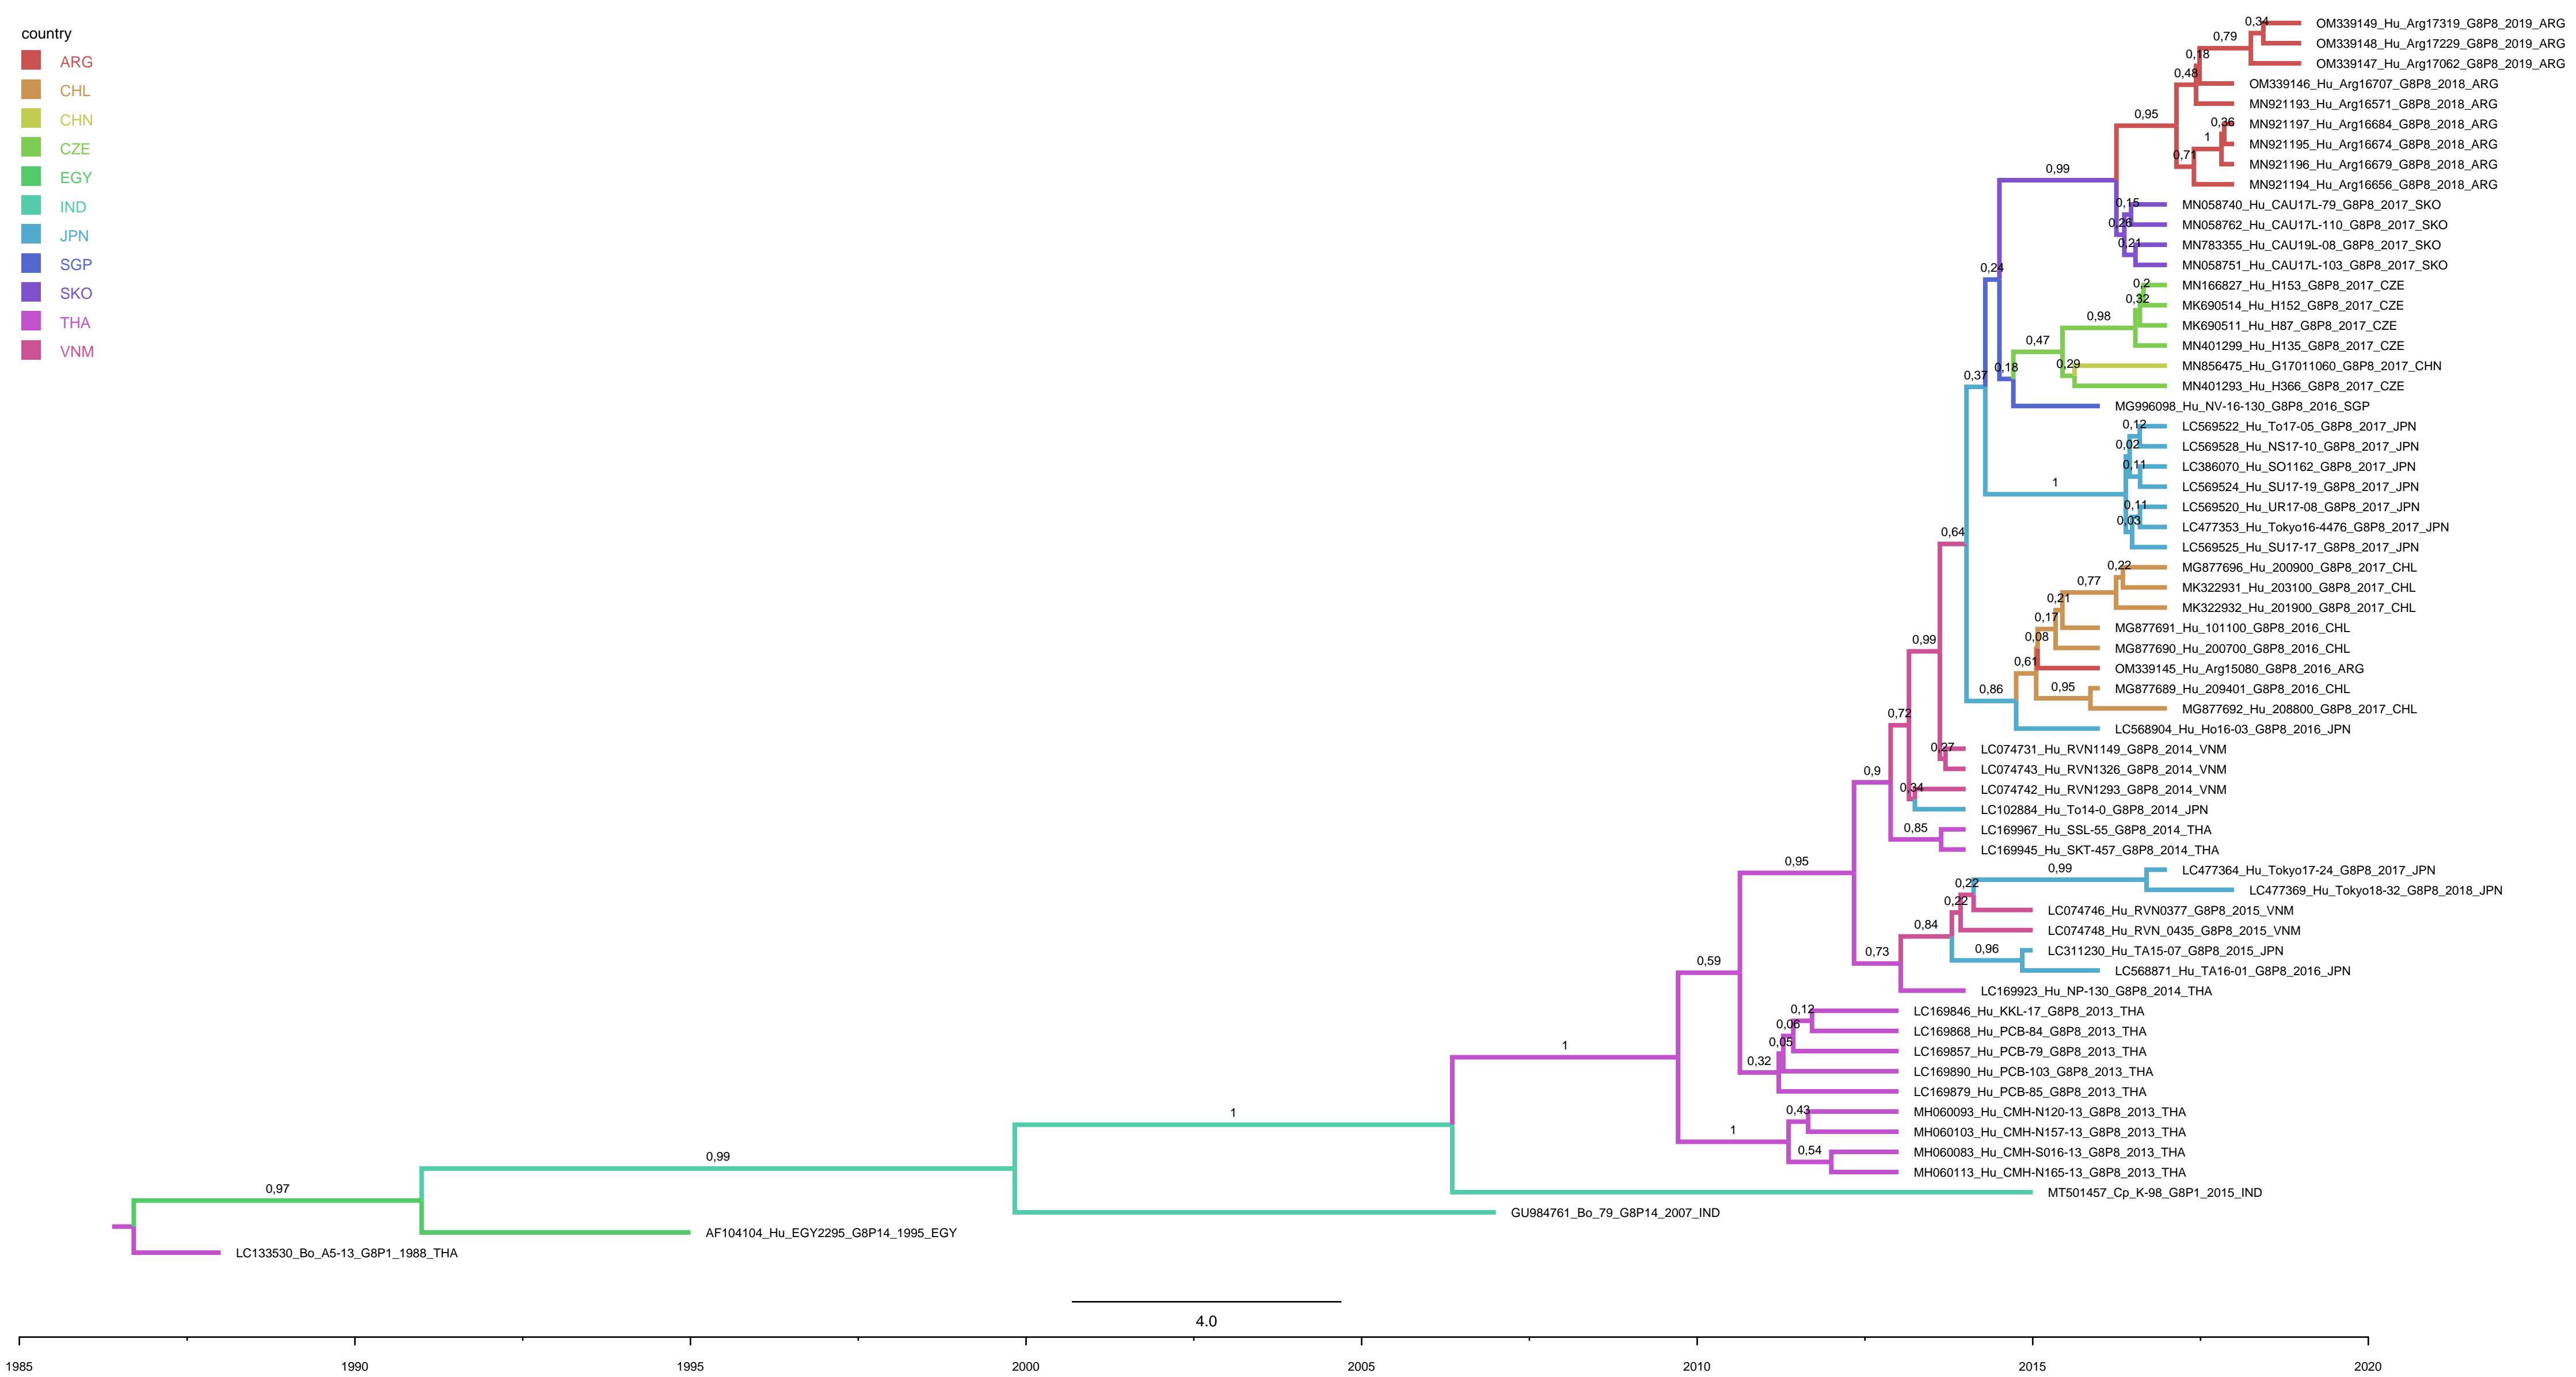

Supplement: s1 [file s1]
